# Supplementary material
Source: publisher figshare collection journal article supplement (https://asha.figshare.com/ndownloader/files/34147032)

**Supplemental Material S1.** Speech level alongside average patient audiogram (converted to dB SPL) and alongside the audiogram of the participant who had the most hearing loss.

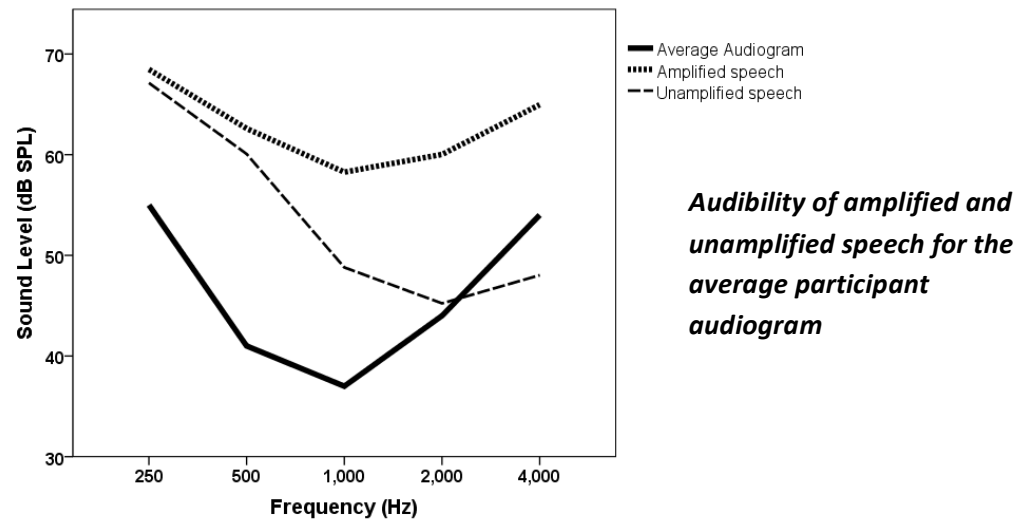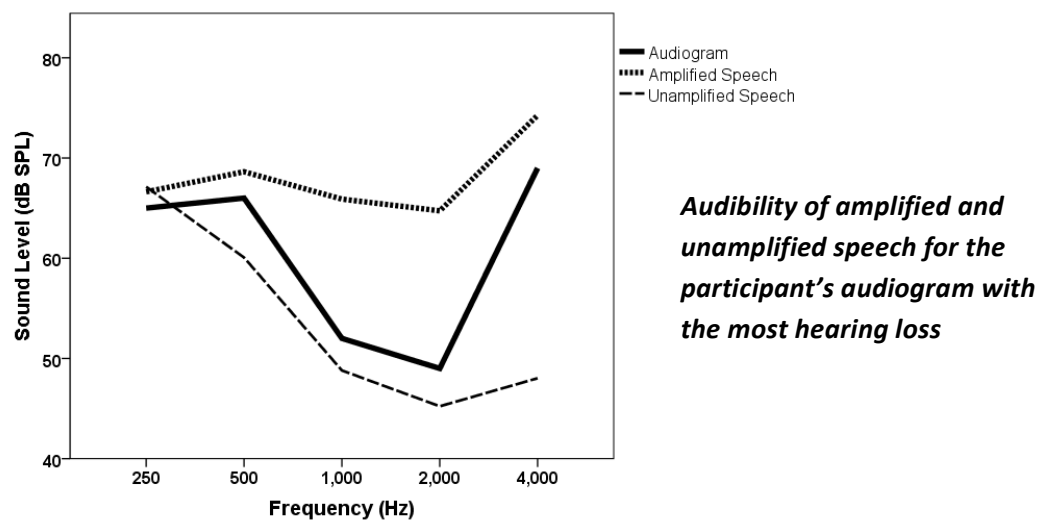

Supplement: Supplementary file 1 [file 34147032]
